# Supplementary material for: Self-Propelling Targeted Magneto-Nanobots for Deep Tumor Penetration and pH-Responsive Intracellular Drug Delivery
Source: PubMed Central journal article supplement (PMC7070039; doi:10.1038/s41598-020-61586-y), 2020-03-13
Supplement: 41598_2020_61586_MOESM1_ESM.pdf [file 41598_2020_61586_MOESM1_ESM.pdf]

# **Self-Propelling Targeted Magneto-Nanobots for Deep Tumor Penetration and pH-Responsive Intracellular Drug Delivery**

Saloni S. Andhari,<sup>1,4</sup> Ravindra D. Wavhale,<sup>2,4</sup> Kshama D. Dhobale,<sup>2</sup> Bhausaheb V. Tawade,<sup>2</sup> Govind P. Chate,<sup>2</sup> Yuvraj N. Patil,<sup>2</sup> Jayant J. Khandare<sup>3\*</sup> and Shashwat S. Banerjee<sup>2\*</sup>

<sup>1</sup> Maharashtra Academy of Engineering Education and Research's Maharashtra Institute of Pharmacy, Pune 411038, India.

<sup>2</sup> Maharashtra Institute of Medical Education and Research, Talegaon Dabhade, Pune 410507, India.

<sup>3</sup> School of Pharmacy, Dr. Vishwanath Karad MIT World Peace University, Pune 411038, India.

<sup>4</sup>These authors contributed equally: Saloni S. Andhari and Ravindra D. Wavhale

\*email: jayant.khandare@mippune.edu.in; shashwatbanerjee@mitmimer.com

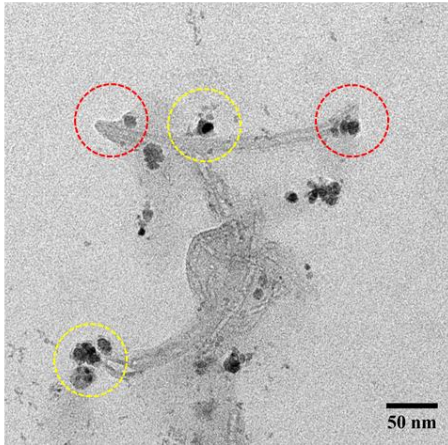

Figure S1. TEM microscopy images of CNT-DOX-Fe<sub>3</sub>O<sub>4</sub>-Tf nanobots with Fe<sub>3</sub>O<sub>4</sub> NP caps at both the ends of CNT (indicated with dashed circles for each CNT).

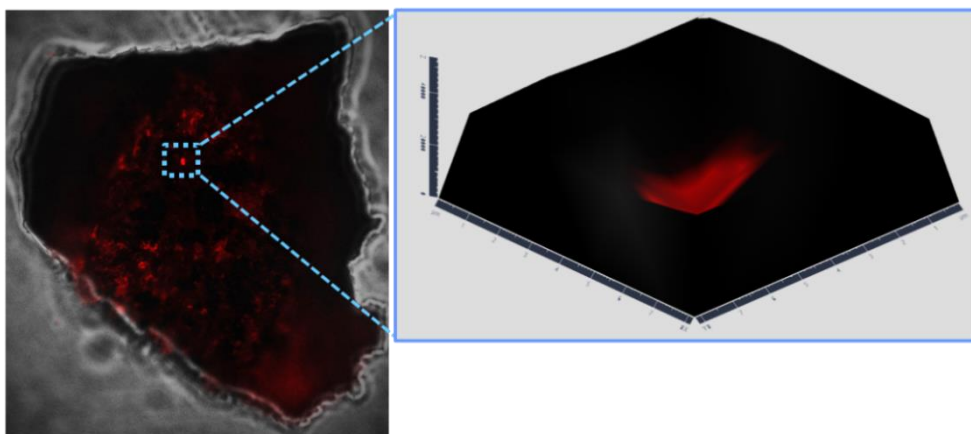

Figure S2. 2.5D microscopy imaging of the CNT-DOX-Fe<sub>3</sub>O<sub>4</sub>-Tf particles, highlighting the presence of DOX (red) within the nanopores of the CNT carrier particle (gray).

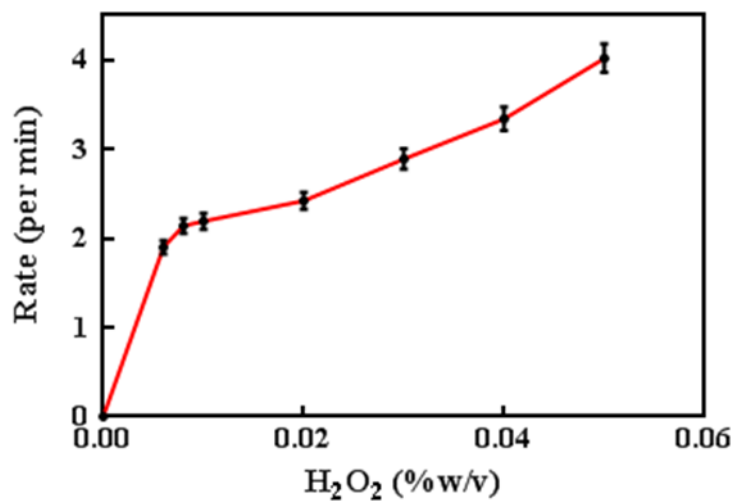

Figure S3. Catalytic ability of Fe<sub>3</sub>O<sub>4</sub> towards H<sub>2</sub>O<sub>2</sub> at various concentrations of H<sub>2</sub>O<sub>2</sub> in PBS pH 7.4.

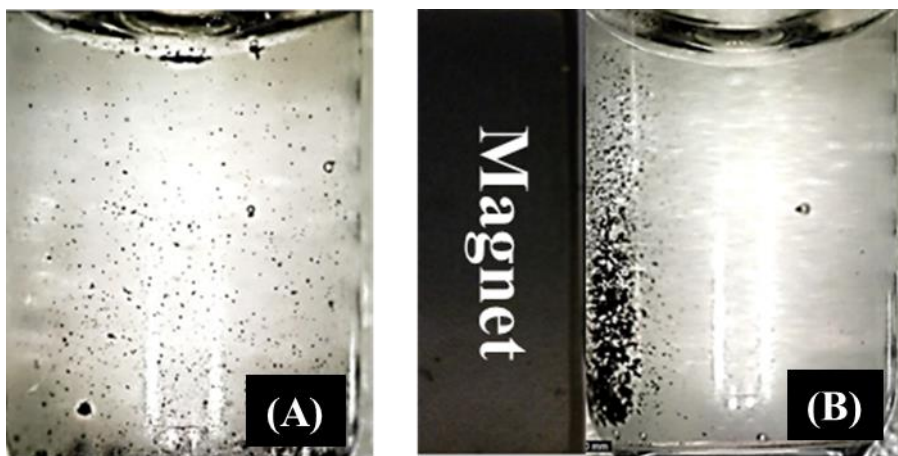

Figure S4. (A) CNT-DOX-Fe<sub>3</sub>O<sub>4</sub>-Tf nanobot with excellent dispersibility and propulsion in PBS containing H<sub>2</sub>O<sub>2</sub>. (B) CNT-DOX-Fe<sub>3</sub>O<sub>4</sub>-Tf nanobot also can be drawn from the solution to the sidewall of the vial under magnetic guidance. The images were captured using Dino-Lite digital microscope at 50X magnification, using the Dino-Capture 2.0v (<https://www.dino-lite.com/>).

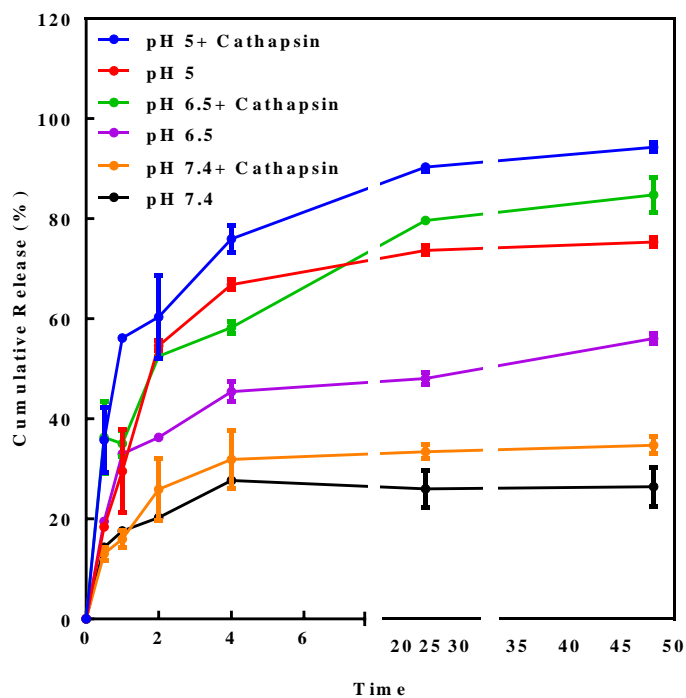

Figure S5. Time dependent cumulative release of DOX from CNT-DOX-Fe<sub>3</sub>O<sub>4</sub>-Tf. Significantly high release of DOX from CNT-DOX-Fe<sub>3</sub>O<sub>4</sub>-Tf in presence of cathapsin B at pH 5 compared to pH 6.5 and 7.4 was observed due to degradation of amide linkage resulting in time-dependent uncapping of CNT. Low release of DOX at pH 7.4 highlighted efficient trapping of DOX in the CNT cavity by with Fe<sub>3</sub>O<sub>4</sub> NPs cap.

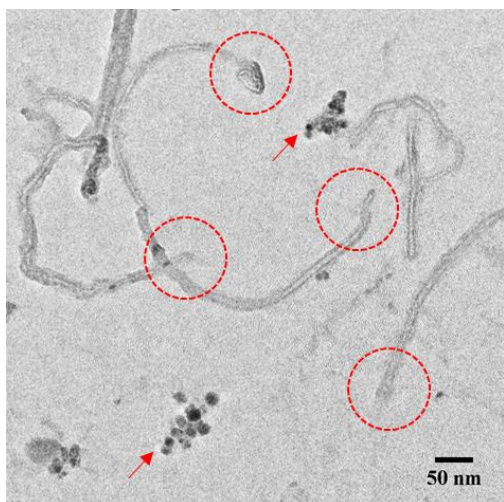

Figure S6. TEM microscopy image of CNT-DOX-Fe<sub>3</sub>O<sub>4</sub> nanobots after release study in phosphate buffer of pH 5.0 containing cathepsin B. Circles in red indicate the terminal ends of CNTs devoid of Fe<sub>3</sub>O<sub>4</sub> NPs, while the red arrows indicate free Fe<sub>3</sub>O<sub>4</sub> NPs separated from the CNTs.

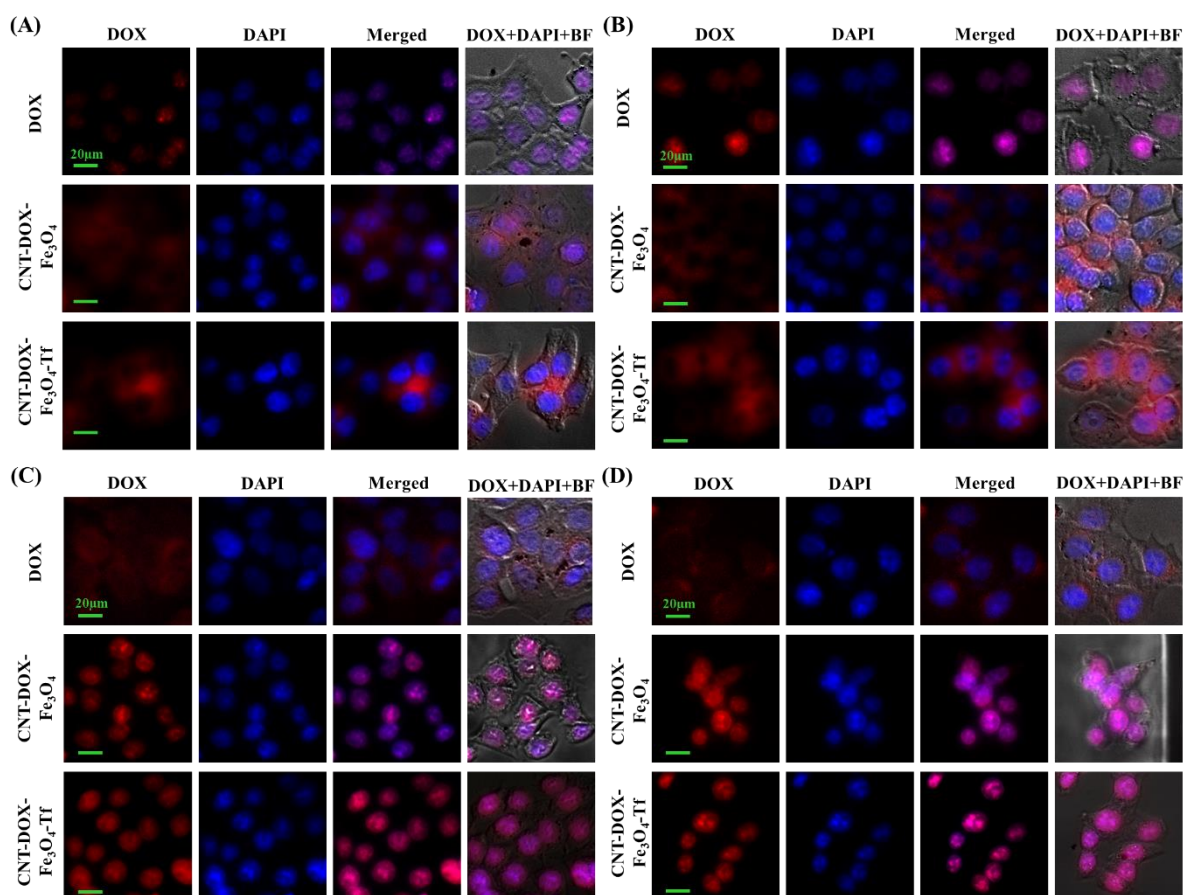

Figure S7. Fluorescent images of HCT116 cells treated with free DOX, CNT-DOX-Fe<sub>3</sub>O<sub>4</sub> and CNT-DOX-Fe<sub>3</sub>O<sub>4</sub>-Tf nanobots. (A) At 1 h exposure and in pH 7.4, free DOX in the cell was higher than that of CNT-DOX-Fe<sub>3</sub>O<sub>4</sub>-Tf. On the other hand, the intensity of DOX released from CNT-DOX-Fe<sub>3</sub>O<sub>4</sub> was higher than CNT-DOX-Fe<sub>3</sub>O<sub>4</sub>-Tf. (B) At 1 h exposure and in pH 6.5, the CNT-DOX-Fe<sub>3</sub>O<sub>4</sub>-Tf nanobot demonstrated increase in cellular drug content in the acidic pH of 6.5. (C) At 48 h and in pH 7.4, most of the DOX is released from CNT-DOX-Fe<sub>3</sub>O<sub>4</sub>-Tf suggesting the efficient expulsion of DOX from interior cavity of CNT after opening of Fe<sub>3</sub>O<sub>4</sub> nanolid in lysosomal conditions. DOX released from CNT-DOX-Fe<sub>3</sub>O<sub>4</sub>-Tf nanobot co-localized with DAPI concentrated in the nuclear region highlighting the nucleosome bodies, which contain the chromatin matter. (D) At 48 h and in pH 6.5, the co-localization of nuclear region effect was more pronounced suggesting preferential binding of



DOX to DNA and nucleosome-bound topoisomerases. Cell shrinkage/disaggregation was observed due to DOX cytotoxicity > 48 h. (Scale bar = 100  $\mu$ m).

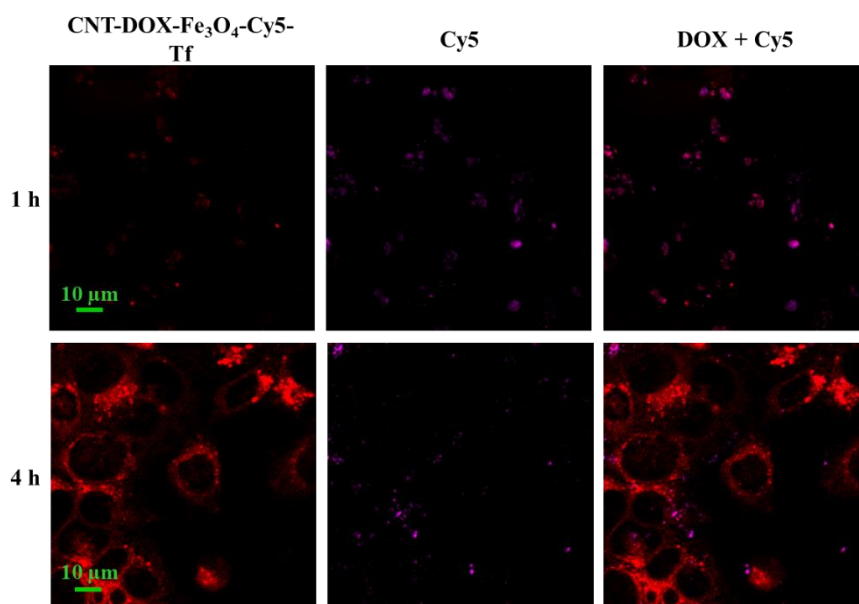

Figure S8. Disengagement of  $\text{Fe}_3\text{O}_4$  NPs resulting in uncapping of CNT-DOX- $\text{Fe}_3\text{O}_4$ -Cy5-Tf nanobots and cellular release of DOX. Strong localization of Cy5 (purple,  $\text{Fe}_3\text{O}_4$  NPs) with DOX (red) at 1 h indicate site-restriction of DOX within CNT-DOX- $\text{Fe}_3\text{O}_4$ -Cy5-Tf NPs. 4 h post-treatment images reveal separation of  $\text{Fe}_3\text{O}_4$  and DOX signals, consistent with detachment of  $\text{Fe}_3\text{O}_4$  caps from CNT and subsequent release of DOX from CNT. Scale bars indicate 10  $\mu\text{m}$ .

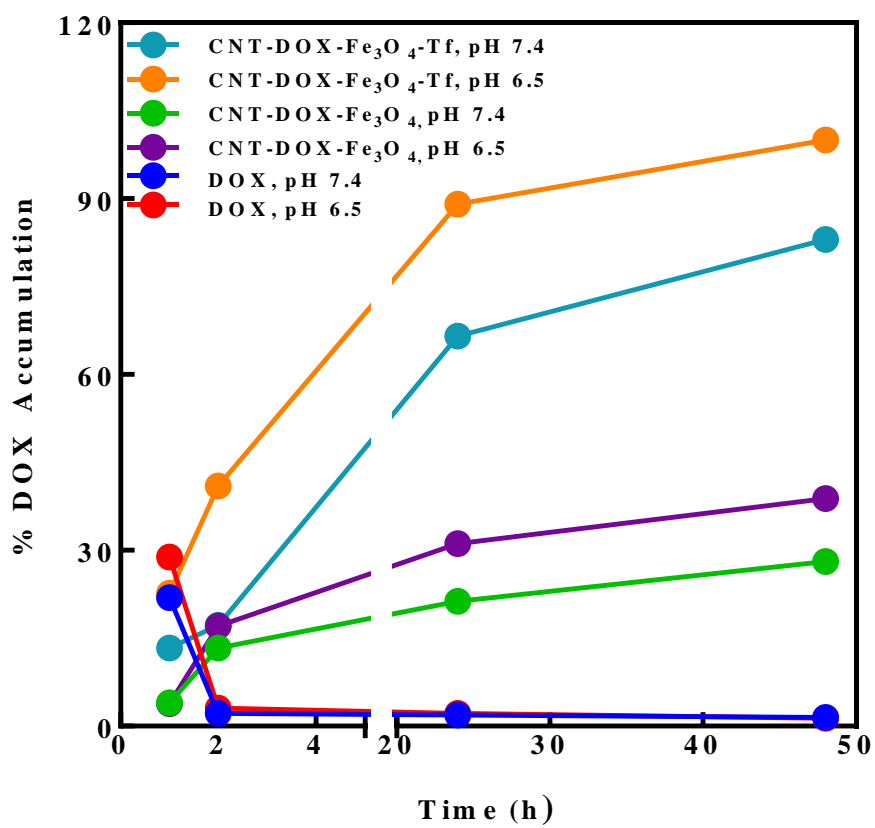

Figure S9. Intracellular DOX accumulation upon treatment with nanobots at varying pH.
